# Supplementary material for: Impacts of nanomaterials on bacterial quorum sensing: differential effects on different signals
Source: Royal Society of Chemistry journal article supplement (doi:10.1039/c5en00273g), 2016-01-01
Supplement: c5en00273g1.pdf [file c5en00273g1.pdf]

**Electronic Supplementary Information (ESI)**

**Impacts of Nanomaterials on Bacterial Quorum Sensing: Differential Effects on Different Signals**

Anee Mohanty,<sup>a,b^</sup> Chuan Hao Tan<sup>b^</sup> and Bin Cao<sup>a,b †</sup>

<sup>a</sup> School of Civil and Environmental Engineering, Nanyang Technological University, Singapore.

<sup>b</sup> Singapore Centre for Environmental Life Sciences Engineering, Nanyang Technological University, Singapore.

<sup>†</sup> Corresponding author: Dr. Bin Cao, School of Civil and Environmental Engineering, Nanyang Technological University, 50 Nanyang Ave, N1-01C-69, Singapore 639798; e-mail: bincao@ntu.edu.sg; Tel: (+65) 6790 5277; Fax: (+65) 6791 0676.

<sup>^</sup> These authors contributed equally.

### **Biosensor assay for QS signals**

For the *E. coli* JB525 bioassay <sup>1, 2</sup>, filtered supernatant of overnight cultures of *P. syringae* were mixed with diluted overnight culture of biosensor in a 96-well plate and incubated at 37°C with constant shaking at 200 r.p.m. for 4 h prior to measurement by a microplate reader (Tecan Infinite M200, Singapore) at an excitation/emission wavelength of 488 nm/515 nm.

1. H. Wu, Z. Song, M. Hentzer, J. B. Andersen, A. Heydorn, K. Mathee, C. Moser, L. Eberl, S. Molin and N. Høiby, *Microbiology*, 2000, **146**, 2481-2493.
2. J. B. Andersen, A. Heydorn, M. Hentzer, L. Eberl, O. Geisenberger, B. B. Christensen, S. r. Molin and M. Givskov, *Applied and Environmental Microbiology*, 2001, **67**, 575-585.

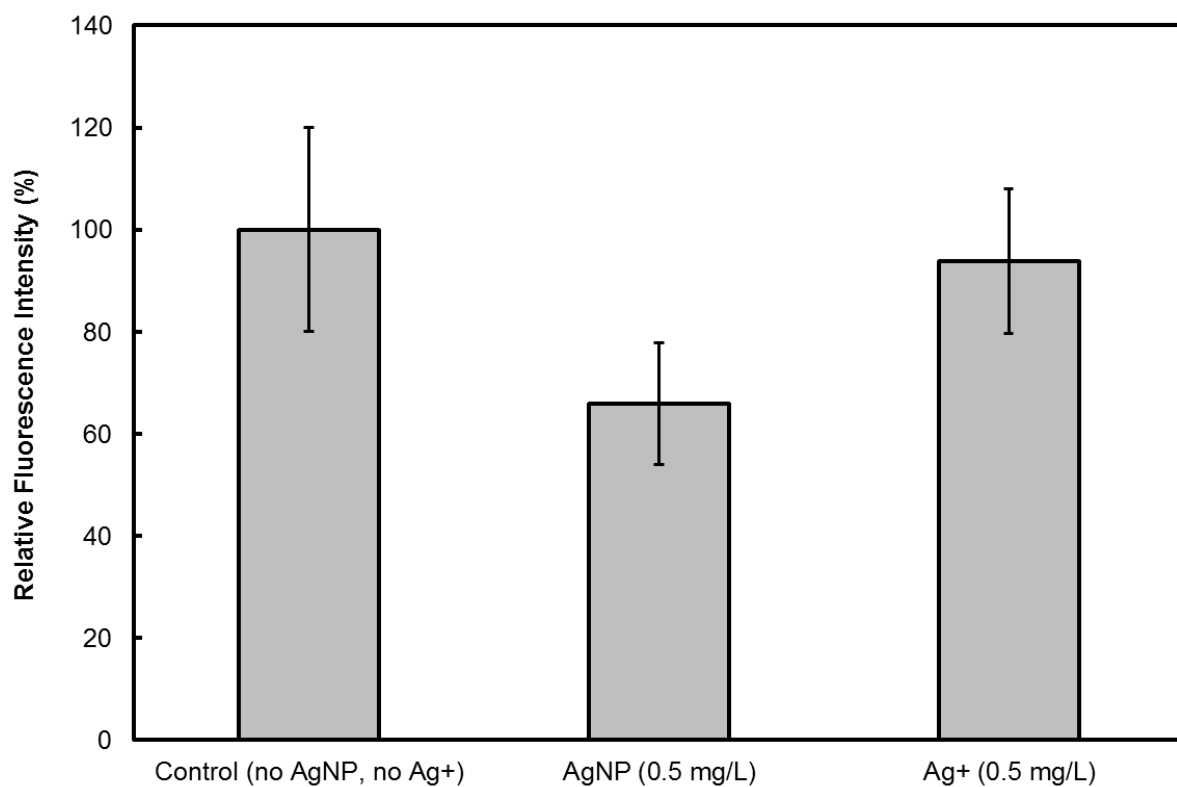

**Fig. S1.** Effect of Ag nanoparticles and soluble salts on QS signalling examined using *E. coli* JB525 bioassay. The relative fluorescence intensity indicates relative concentration of QS signals in the bacterial cultures.
